# Supplementary material for: PDHB-AS suppresses cervical cancer progression and cisplatin resistance via inhibition on Wnt/β-catenin pathway
Source: PubMed Central journal article supplement (PMC9905568; doi:10.1038/s41419-022-05547-5), 2023-02-07
Supplement: 41419_2022_5547_MOESM3_ESM.pdf [file 41419_2022_5547_MOESM3_ESM.pdf]

# Cell Line Authentication Service

---

## STR Profiling Report

**Sample From:** Guangdong Provincial  
People's Hospital

**Sample Type:** Cell Line

**Testing Method:** STR Genotyping

**Report Time:** 12/24/2021

## COMPANY STATEMENT

1. THIS REPORT IS ONLY RESPONSIBLE FOR THE SAMPLES ANALYZED.
2. THE TESTING RESULTS AND THE ORGANIZATION NAME WILL NOT BE USED FOR ADVERTISEMENT, COMMERCIAL EXHIBITIONS, COMMERCIAL PERFORMANCE AND OTHER COMMERCIAL ACTIVITIES.
3. OBJECTIONS SHOULD BE RAISED WITHIN FIFTEEN DAYS AFTER THE RECEIPT OF THIS REPORT.
4. THE PAPER REPORT WITH CONTENT ALTERING, ADDING OR WITHOUT THE STAMPED SEAL OF THE COMPANY ARE INVALID.

**Testing Company:** Shanghai Chenying Biotechnology Co. Ltd

**Address:** Room 502, NO.2 Zhongxing Creative Park, Lane 1015, Longteng Road, Songjiang District, Shanghai

**Tel:** +86-021-33559493

**Contact:** Wenyao Zhang

**E-mail:** market@biowing.com

## Cell Line Authentication – STR Profiling Report

### Sample code

Table 1. Sample Code

| Customer's code | Company Code |
|-----------------|--------------|
| C33A            | 20211224-01  |

**Sample Number:** 1

**Sample Type:** Cell line

**Testing Type:** STR

**Testing Method:**

DNA was extracted by a commercial kit from CORNING (AP-EMN-BL-GDNA-250G). The twenty STRs including Amelogenin locus were amplified by six multiplex PCR and separated on ABI 3730XL Genetic Analyzer. The signals were then analyzed by the software GeneMapper.

### Data Interpretation:

Cell lines were authenticated using Short Tandem Repeat (STR) analysis as described in 2012 in ANSI Standard (ASN-0002) by the ATCC Standards Development Organization (SDO) and in Capes-Davis et al., Match criteria for human cell line authentication: Where do we draw the line? *Int J Cancer*.2013;132(11):2510-9.

# Test Results

## 1. STR profile

Table 2. STR and Amelogenin Genotyping Results of Cell line.

| Loci    | Sample information |         |         | Cell Bank information |         |         |
|---------|--------------------|---------|---------|-----------------------|---------|---------|
|         | Sample name : C33A |         |         | Cell line name : C33A |         |         |
|         | Allele1            | Allele2 | Allele3 | Allele1               | Allele2 | Allele3 |
| D5S818  | 11                 | 12      |         | 11                    | 12      |         |
| D13S317 | 13                 |         |         | 13                    |         |         |
| D7S820  | 10                 |         |         | 10                    |         |         |
| D16S539 | 13                 | 14      |         | 13                    | 14      |         |
| VWA     | 18                 | 20      |         | 18                    | 20      |         |
| TH01    | 7                  | 8       |         | 7                     | 8       |         |
| AMEL    | X                  | X       |         | X                     | X       |         |
| TPOX    | 9                  |         |         | 9                     |         |         |
| CSF1PO  | 12                 |         |         | 12                    |         |         |
| FGA     | 21                 | 26      |         |                       |         |         |
| Penta E | 6                  | 8       |         |                       |         |         |
| Penta D | 10                 |         |         |                       |         |         |
| D21S11  | 29                 | 30      | 31      |                       |         |         |
| D18S51  | 15                 | 17      | 18      |                       |         |         |
| D8S1179 | 10                 | 14      |         |                       |         |         |
| D3S1358 | 16                 |         |         |                       |         |         |
| D19S433 | 11                 | 13      | 14      |                       |         |         |
| D2S1338 | 23                 | 25      |         |                       |         |         |

**2. database annotation****Figure 1. STR matching analysis**

| <b>Cell line name</b>                     | C-33 A                                                                                                                                                                                                                                                                                                                                                                                                                                                                                                                                                                                                                                                                                                                                                                                                                                                                                                                                                        |            |          |         |      |                 |       |                   |      |                   |       |             |      |                 |       |                 |       |         |       |        |                                              |         |          |        |          |     |       |         |    |         |     |      |     |      |   |     |       |
|-------------------------------------------|---------------------------------------------------------------------------------------------------------------------------------------------------------------------------------------------------------------------------------------------------------------------------------------------------------------------------------------------------------------------------------------------------------------------------------------------------------------------------------------------------------------------------------------------------------------------------------------------------------------------------------------------------------------------------------------------------------------------------------------------------------------------------------------------------------------------------------------------------------------------------------------------------------------------------------------------------------------|------------|----------|---------|------|-----------------|-------|-------------------|------|-------------------|-------|-------------|------|-----------------|-------|-----------------|-------|---------|-------|--------|----------------------------------------------|---------|----------|--------|----------|-----|-------|---------|----|---------|-----|------|-----|------|---|-----|-------|
| <b>Synonyms</b>                           | C33A; C33a; C33-A; C-33-A; C-33A; C33                                                                                                                                                                                                                                                                                                                                                                                                                                                                                                                                                                                                                                                                                                                                                                                                                                                                                                                         |            |          |         |      |                 |       |                   |      |                   |       |             |      |                 |       |                 |       |         |       |        |                                              |         |          |        |          |     |       |         |    |         |     |      |     |      |   |     |       |
| <b>Accession</b>                          | CVCL_1094                                                                                                                                                                                                                                                                                                                                                                                                                                                                                                                                                                                                                                                                                                                                                                                                                                                                                                                                                     |            |          |         |      |                 |       |                   |      |                   |       |             |      |                 |       |                 |       |         |       |        |                                              |         |          |        |          |     |       |         |    |         |     |      |     |      |   |     |       |
| <b>Resource Identification Initiative</b> | To cite this cell line use: C-33 A (RRID:CVCL_1094)                                                                                                                                                                                                                                                                                                                                                                                                                                                                                                                                                                                                                                                                                                                                                                                                                                                                                                           |            |          |         |      |                 |       |                   |      |                   |       |             |      |                 |       |                 |       |         |       |        |                                              |         |          |        |          |     |       |         |    |         |     |      |     |      |   |     |       |
| <b>Comments</b>                           | Part of: Cancer Dependency Map project (DepMap) (includes Cancer Cell Line Encyclopedia - CCLE).<br>Part of: COSMIC cell lines project.<br>Part of: PTEN genetic alteration cell panel (ATCC TCP-1030).<br>Doubling time: 1.36 days (PubMed=29156801).<br>Microsatellite instability: Instable (MSI-high) (PubMed=31068700; Sanger).<br>Omics: Deep exome analysis.<br>Omics: Deep RNAseq analysis.<br>Omics: DNA methylation analysis.<br>Omics: Protein expression by reverse-phase protein arrays.<br>Omics: SNP array analysis.<br>Omics: Transcriptome analysis.                                                                                                                                                                                                                                                                                                                                                                                         |            |          |         |      |                 |       |                   |      |                   |       |             |      |                 |       |                 |       |         |       |        |                                              |         |          |        |          |     |       |         |    |         |     |      |     |      |   |     |       |
| <b>Sequence variations</b>                | Mutation; HGNC; 11998; TP53; Simple; p.Arg273Cys (c.817C>T); ClinVar=VCV000043594; Zygosity=Unspecified (PubMed=1648218).                                                                                                                                                                                                                                                                                                                                                                                                                                                                                                                                                                                                                                                                                                                                                                                                                                     |            |          |         |      |                 |       |                   |      |                   |       |             |      |                 |       |                 |       |         |       |        |                                              |         |          |        |          |     |       |         |    |         |     |      |     |      |   |     |       |
| <b>Genome ancestry</b>                    | Source: PubMed=30894373<br><table border="1"> <thead> <tr> <th>Origin</th> <th>% genome</th> </tr> </thead> <tbody> <tr> <td>African</td> <td>0.41</td> </tr> <tr> <td>Native American</td> <td>0.33</td> </tr> <tr> <td>East Asian, North</td> <td>0.48</td> </tr> <tr> <td>East Asian, South</td> <td>0.19</td> </tr> <tr> <td>South Asian</td> <td>0.82</td> </tr> <tr> <td>European, North</td> <td>66.58</td> </tr> <tr> <td>European, South</td> <td>31.19</td> </tr> </tbody> </table>                                                                                                                                                                                                                                                                                                                                                                                                                                                                 | Origin     | % genome | African | 0.41 | Native American | 0.33  | East Asian, North | 0.48 | East Asian, South | 0.19  | South Asian | 0.82 | European, North | 66.58 | European, South | 31.19 |         |       |        |                                              |         |          |        |          |     |       |         |    |         |     |      |     |      |   |     |       |
| Origin                                    | % genome                                                                                                                                                                                                                                                                                                                                                                                                                                                                                                                                                                                                                                                                                                                                                                                                                                                                                                                                                      |            |          |         |      |                 |       |                   |      |                   |       |             |      |                 |       |                 |       |         |       |        |                                              |         |          |        |          |     |       |         |    |         |     |      |     |      |   |     |       |
| African                                   | 0.41                                                                                                                                                                                                                                                                                                                                                                                                                                                                                                                                                                                                                                                                                                                                                                                                                                                                                                                                                          |            |          |         |      |                 |       |                   |      |                   |       |             |      |                 |       |                 |       |         |       |        |                                              |         |          |        |          |     |       |         |    |         |     |      |     |      |   |     |       |
| Native American                           | 0.33                                                                                                                                                                                                                                                                                                                                                                                                                                                                                                                                                                                                                                                                                                                                                                                                                                                                                                                                                          |            |          |         |      |                 |       |                   |      |                   |       |             |      |                 |       |                 |       |         |       |        |                                              |         |          |        |          |     |       |         |    |         |     |      |     |      |   |     |       |
| East Asian, North                         | 0.48                                                                                                                                                                                                                                                                                                                                                                                                                                                                                                                                                                                                                                                                                                                                                                                                                                                                                                                                                          |            |          |         |      |                 |       |                   |      |                   |       |             |      |                 |       |                 |       |         |       |        |                                              |         |          |        |          |     |       |         |    |         |     |      |     |      |   |     |       |
| East Asian, South                         | 0.19                                                                                                                                                                                                                                                                                                                                                                                                                                                                                                                                                                                                                                                                                                                                                                                                                                                                                                                                                          |            |          |         |      |                 |       |                   |      |                   |       |             |      |                 |       |                 |       |         |       |        |                                              |         |          |        |          |     |       |         |    |         |     |      |     |      |   |     |       |
| South Asian                               | 0.82                                                                                                                                                                                                                                                                                                                                                                                                                                                                                                                                                                                                                                                                                                                                                                                                                                                                                                                                                          |            |          |         |      |                 |       |                   |      |                   |       |             |      |                 |       |                 |       |         |       |        |                                              |         |          |        |          |     |       |         |    |         |     |      |     |      |   |     |       |
| European, North                           | 66.58                                                                                                                                                                                                                                                                                                                                                                                                                                                                                                                                                                                                                                                                                                                                                                                                                                                                                                                                                         |            |          |         |      |                 |       |                   |      |                   |       |             |      |                 |       |                 |       |         |       |        |                                              |         |          |        |          |     |       |         |    |         |     |      |     |      |   |     |       |
| European, South                           | 31.19                                                                                                                                                                                                                                                                                                                                                                                                                                                                                                                                                                                                                                                                                                                                                                                                                                                                                                                                                         |            |          |         |      |                 |       |                   |      |                   |       |             |      |                 |       |                 |       |         |       |        |                                              |         |          |        |          |     |       |         |    |         |     |      |     |      |   |     |       |
| <b>Disease</b>                            | Cervical squamous cell carcinoma, not otherwise specified (NCIt: C4028)<br>Squamous cell carcinoma of the cervix uteri (ORDO: Orphanet_213767)                                                                                                                                                                                                                                                                                                                                                                                                                                                                                                                                                                                                                                                                                                                                                                                                                |            |          |         |      |                 |       |                   |      |                   |       |             |      |                 |       |                 |       |         |       |        |                                              |         |          |        |          |     |       |         |    |         |     |      |     |      |   |     |       |
| <b>Species of origin</b>                  | Homo sapiens (Human) (NCBI Taxonomy: 9606)                                                                                                                                                                                                                                                                                                                                                                                                                                                                                                                                                                                                                                                                                                                                                                                                                                                                                                                    |            |          |         |      |                 |       |                   |      |                   |       |             |      |                 |       |                 |       |         |       |        |                                              |         |          |        |          |     |       |         |    |         |     |      |     |      |   |     |       |
| <b>Species of origin</b>                  | Homo sapiens (Human) (NCBI Taxonomy: 9606)                                                                                                                                                                                                                                                                                                                                                                                                                                                                                                                                                                                                                                                                                                                                                                                                                                                                                                                    |            |          |         |      |                 |       |                   |      |                   |       |             |      |                 |       |                 |       |         |       |        |                                              |         |          |        |          |     |       |         |    |         |     |      |     |      |   |     |       |
| <b>Sex of cell</b>                        | Female                                                                                                                                                                                                                                                                                                                                                                                                                                                                                                                                                                                                                                                                                                                                                                                                                                                                                                                                                        |            |          |         |      |                 |       |                   |      |                   |       |             |      |                 |       |                 |       |         |       |        |                                              |         |          |        |          |     |       |         |    |         |     |      |     |      |   |     |       |
| <b>Age at sampling</b>                    | 66Y                                                                                                                                                                                                                                                                                                                                                                                                                                                                                                                                                                                                                                                                                                                                                                                                                                                                                                                                                           |            |          |         |      |                 |       |                   |      |                   |       |             |      |                 |       |                 |       |         |       |        |                                              |         |          |        |          |     |       |         |    |         |     |      |     |      |   |     |       |
| <b>Category</b>                           | Cancer cell line                                                                                                                                                                                                                                                                                                                                                                                                                                                                                                                                                                                                                                                                                                                                                                                                                                                                                                                                              |            |          |         |      |                 |       |                   |      |                   |       |             |      |                 |       |                 |       |         |       |        |                                              |         |          |        |          |     |       |         |    |         |     |      |     |      |   |     |       |
| <b>STR profile</b>                        | Source(s): AddexBio; ATCC; CCRID; Cosmic-CLP; DepMap; PubMed=25877200<br><b>Markers:</b><br><table border="1"> <tbody> <tr><td>Amelogenin</td><td>X</td></tr> <tr><td>CSF1PO</td><td>12</td></tr> <tr><td>D2S1338</td><td>23,25</td></tr> <tr><td>D3S1358</td><td>16</td></tr> <tr><td>D5S818</td><td>11,12</td></tr> <tr><td>D7S820</td><td>10</td></tr> <tr><td>D8S1179</td><td>10,14</td></tr> <tr><td>D13S317</td><td>13</td></tr> <tr><td>D16S539</td><td>13,14</td></tr> <tr><td>D18S51</td><td>15,17,18 (DepMap)<br/>15,18 (PubMed=25877200)</td></tr> <tr><td>D19S433</td><td>11,13,14</td></tr> <tr><td>D21S11</td><td>29,30,31</td></tr> <tr><td>FGA</td><td>21,26</td></tr> <tr><td>Penta D</td><td>10</td></tr> <tr><td>Penta E</td><td>6,8</td></tr> <tr><td>TH01</td><td>7,8</td></tr> <tr><td>TPOX</td><td>9</td></tr> <tr><td>vWA</td><td>18,20</td></tr> </tbody> </table><br><a href="#">Run an STR similarity search on this cell line</a> | Amelogenin | X        | CSF1PO  | 12   | D2S1338         | 23,25 | D3S1358           | 16   | D5S818            | 11,12 | D7S820      | 10   | D8S1179         | 10,14 | D13S317         | 13    | D16S539 | 13,14 | D18S51 | 15,17,18 (DepMap)<br>15,18 (PubMed=25877200) | D19S433 | 11,13,14 | D21S11 | 29,30,31 | FGA | 21,26 | Penta D | 10 | Penta E | 6,8 | TH01 | 7,8 | TPOX | 9 | vWA | 18,20 |
| Amelogenin                                | X                                                                                                                                                                                                                                                                                                                                                                                                                                                                                                                                                                                                                                                                                                                                                                                                                                                                                                                                                             |            |          |         |      |                 |       |                   |      |                   |       |             |      |                 |       |                 |       |         |       |        |                                              |         |          |        |          |     |       |         |    |         |     |      |     |      |   |     |       |
| CSF1PO                                    | 12                                                                                                                                                                                                                                                                                                                                                                                                                                                                                                                                                                                                                                                                                                                                                                                                                                                                                                                                                            |            |          |         |      |                 |       |                   |      |                   |       |             |      |                 |       |                 |       |         |       |        |                                              |         |          |        |          |     |       |         |    |         |     |      |     |      |   |     |       |
| D2S1338                                   | 23,25                                                                                                                                                                                                                                                                                                                                                                                                                                                                                                                                                                                                                                                                                                                                                                                                                                                                                                                                                         |            |          |         |      |                 |       |                   |      |                   |       |             |      |                 |       |                 |       |         |       |        |                                              |         |          |        |          |     |       |         |    |         |     |      |     |      |   |     |       |
| D3S1358                                   | 16                                                                                                                                                                                                                                                                                                                                                                                                                                                                                                                                                                                                                                                                                                                                                                                                                                                                                                                                                            |            |          |         |      |                 |       |                   |      |                   |       |             |      |                 |       |                 |       |         |       |        |                                              |         |          |        |          |     |       |         |    |         |     |      |     |      |   |     |       |
| D5S818                                    | 11,12                                                                                                                                                                                                                                                                                                                                                                                                                                                                                                                                                                                                                                                                                                                                                                                                                                                                                                                                                         |            |          |         |      |                 |       |                   |      |                   |       |             |      |                 |       |                 |       |         |       |        |                                              |         |          |        |          |     |       |         |    |         |     |      |     |      |   |     |       |
| D7S820                                    | 10                                                                                                                                                                                                                                                                                                                                                                                                                                                                                                                                                                                                                                                                                                                                                                                                                                                                                                                                                            |            |          |         |      |                 |       |                   |      |                   |       |             |      |                 |       |                 |       |         |       |        |                                              |         |          |        |          |     |       |         |    |         |     |      |     |      |   |     |       |
| D8S1179                                   | 10,14                                                                                                                                                                                                                                                                                                                                                                                                                                                                                                                                                                                                                                                                                                                                                                                                                                                                                                                                                         |            |          |         |      |                 |       |                   |      |                   |       |             |      |                 |       |                 |       |         |       |        |                                              |         |          |        |          |     |       |         |    |         |     |      |     |      |   |     |       |
| D13S317                                   | 13                                                                                                                                                                                                                                                                                                                                                                                                                                                                                                                                                                                                                                                                                                                                                                                                                                                                                                                                                            |            |          |         |      |                 |       |                   |      |                   |       |             |      |                 |       |                 |       |         |       |        |                                              |         |          |        |          |     |       |         |    |         |     |      |     |      |   |     |       |
| D16S539                                   | 13,14                                                                                                                                                                                                                                                                                                                                                                                                                                                                                                                                                                                                                                                                                                                                                                                                                                                                                                                                                         |            |          |         |      |                 |       |                   |      |                   |       |             |      |                 |       |                 |       |         |       |        |                                              |         |          |        |          |     |       |         |    |         |     |      |     |      |   |     |       |
| D18S51                                    | 15,17,18 (DepMap)<br>15,18 (PubMed=25877200)                                                                                                                                                                                                                                                                                                                                                                                                                                                                                                                                                                                                                                                                                                                                                                                                                                                                                                                  |            |          |         |      |                 |       |                   |      |                   |       |             |      |                 |       |                 |       |         |       |        |                                              |         |          |        |          |     |       |         |    |         |     |      |     |      |   |     |       |
| D19S433                                   | 11,13,14                                                                                                                                                                                                                                                                                                                                                                                                                                                                                                                                                                                                                                                                                                                                                                                                                                                                                                                                                      |            |          |         |      |                 |       |                   |      |                   |       |             |      |                 |       |                 |       |         |       |        |                                              |         |          |        |          |     |       |         |    |         |     |      |     |      |   |     |       |
| D21S11                                    | 29,30,31                                                                                                                                                                                                                                                                                                                                                                                                                                                                                                                                                                                                                                                                                                                                                                                                                                                                                                                                                      |            |          |         |      |                 |       |                   |      |                   |       |             |      |                 |       |                 |       |         |       |        |                                              |         |          |        |          |     |       |         |    |         |     |      |     |      |   |     |       |
| FGA                                       | 21,26                                                                                                                                                                                                                                                                                                                                                                                                                                                                                                                                                                                                                                                                                                                                                                                                                                                                                                                                                         |            |          |         |      |                 |       |                   |      |                   |       |             |      |                 |       |                 |       |         |       |        |                                              |         |          |        |          |     |       |         |    |         |     |      |     |      |   |     |       |
| Penta D                                   | 10                                                                                                                                                                                                                                                                                                                                                                                                                                                                                                                                                                                                                                                                                                                                                                                                                                                                                                                                                            |            |          |         |      |                 |       |                   |      |                   |       |             |      |                 |       |                 |       |         |       |        |                                              |         |          |        |          |     |       |         |    |         |     |      |     |      |   |     |       |
| Penta E                                   | 6,8                                                                                                                                                                                                                                                                                                                                                                                                                                                                                                                                                                                                                                                                                                                                                                                                                                                                                                                                                           |            |          |         |      |                 |       |                   |      |                   |       |             |      |                 |       |                 |       |         |       |        |                                              |         |          |        |          |     |       |         |    |         |     |      |     |      |   |     |       |
| TH01                                      | 7,8                                                                                                                                                                                                                                                                                                                                                                                                                                                                                                                                                                                                                                                                                                                                                                                                                                                                                                                                                           |            |          |         |      |                 |       |                   |      |                   |       |             |      |                 |       |                 |       |         |       |        |                                              |         |          |        |          |     |       |         |    |         |     |      |     |      |   |     |       |
| TPOX                                      | 9                                                                                                                                                                                                                                                                                                                                                                                                                                                                                                                                                                                                                                                                                                                                                                                                                                                                                                                                                             |            |          |         |      |                 |       |                   |      |                   |       |             |      |                 |       |                 |       |         |       |        |                                              |         |          |        |          |     |       |         |    |         |     |      |     |      |   |     |       |
| vWA                                       | 18,20                                                                                                                                                                                                                                                                                                                                                                                                                                                                                                                                                                                                                                                                                                                                                                                                                                                                                                                                                         |            |          |         |      |                 |       |                   |      |                   |       |             |      |                 |       |                 |       |         |       |        |                                              |         |          |        |          |     |       |         |    |         |     |      |     |      |   |     |       |

**Note:** The STR online match analysis of the test cell against EXPASY database, showing cell number (Cell No.) and cell name.

**3. Authentication**

- The submitted sample profile is human, but not a match for any profile in the DSMZ STR database.
- The submitted profile is an exact match for the following human cell line(s) in the EXPASY STR database (8 core loci plus Amelogenin) **C33A**.
- The submitted profile is similar to the following DSMZ human cell line: /.

*Your Intimate Partner in Bioscience!*

- **Note:** A cell line can be considered to be authenticated when 80% (exact match) of the alleles in its STR profile match profiles from tissue or other cell line samples from that donor or from database. Cell lines with between a 55% to 80% (similar) match require further profiling for investigation of relatedness.

# Appendix:

## 1. Genotyping Strategy and Site Distribution

Table S1. Experimental Strategy and Sites

|   | Strategy 1 | Strategy 2 | Strategy 3 | Strategy 4 |
|---|------------|------------|------------|------------|
| 1 | D3S1358    | D8S1179    | D19S433    | AMEL       |
| 2 | VWA        | D21S11     | TH01       | D1S1656    |
| 3 | D7S820     | D16S539    | D13S317    | D5S818     |
| 4 | CSF1PO     | D2S1338    | TPOX       | D12S391    |
| 5 | PENTAE     | PENTAD     | D18S51     | FGA        |
| 6 | D6S1043    |            |            |            |

*The allele match algorithm compares the 8 core loci plus amelogenin only, even though alleles from all loci will be reported when available.*

2. DSMZ tools was used to carry on the cell line comparison, which contains 2455 cell lines STR data from ATCC, DSMZ, JCRB ,ECACC, GNE and RIKEN databases. If the cell is not included in the above cell library, users need to compared with other databases.

**Technician:** Jianan Zhang

**Checked by:** Ning Qian

**Issued by:** Yang Bai

**Issue date:** 12/24/2021
