# Supplementary material for: PDHB-AS suppresses cervical cancer progression and cisplatin resistance via inhibition on Wnt/β-catenin pathway
Source: PubMed Central journal article supplement (PMC9905568; doi:10.1038/s41419-022-05547-5), 2023-02-07
Supplement: 41419_2022_5547_MOESM6_ESM.pdf [file 41419_2022_5547_MOESM6_ESM.pdf]

# Cell Line Authentication Service

---

## STR Profiling Report

**Sample From:** Guangdong Provincial  
People's Hospital

**Sample Type:** Cell Line

**Testing Method:** STR Genotyping

**Report Time:** 12/24/2021

## COMPANY STATEMENT

1. THIS REPORT IS ONLY RESPONSIBLE FOR THE SAMPLES ANALYZED.
2. THE TESTING RESULTS AND THE ORGANIZATION NAME WILL NOT BE USED FOR ADVERTISEMENT, COMMERCIAL EXHIBITIONS, COMMERCIAL PERFORMANCE AND OTHER COMMERCIAL ACTIVITIES.
3. OBJECTIONS SHOULD BE RAISED WITHIN FIFTEEN DAYS AFTER THE RECEIPT OF THIS REPORT.
4. THE PAPER REPORT WITH CONTENT ALTERING, ADDING OR WITHOUT THE STAMPED SEAL OF THE COMPANY ARE INVALID.

**Testing Company:** Shanghai Chenying Biotechnology Co. Ltd

**Address:** Room 502, NO.2 Zhongxing Creative Park, Lane 1015, Longteng Road, Songjiang District, Shanghai

**Tel:** +86-021-33559493

**Contact:** Wenyao Zhang

**E-mail:** market@biowing.com

## Cell Line Authentication – STR Profiling Report

### Sample code

Table 1. Sample Code

| Customer's code | Company Code |
|-----------------|--------------|
| HeLa            | 20211224-01  |

**Sample Number:** 1

**Sample Type:** Cell line

**Testing Type:** STR

**Testing Method:**

DNA was extracted by a commercial kit from CORNING (AP-EMN-BL-GDNA-250G). The twenty STRs including Amelogenin locus were amplified by six multiplex PCR and separated on ABI 3730XL Genetic Analyzer. The signals were then analyzed by the software GeneMapper.

**Data Interpretation:**

Cell lines were authenticated using Short Tandem Repeat (STR) analysis as described in 2012 in ANSI Standard (ASN-0002) by the ATCC Standards Development Organization (SDO) and in Capes-Davis et al., Match criteria for human cell line authentication: Where do we draw the line? *Int J Cancer*.2013;132(11):2510-9.

# Test Results

## 1. STR profile

Table 2. STR and Amelogenin Genotyping Results of Cell line.

| Loci     | Sample information |         |         | Cell Bank information |         |         |
|----------|--------------------|---------|---------|-----------------------|---------|---------|
|          | Sample name : HeLa |         |         | Cell line name : HeLa |         |         |
|          | Allele1            | Allele2 | Allele3 | Allele1               | Allele2 | Allele3 |
| D5S818   | 11                 | 12      |         | 11                    | 12      |         |
| D13S317  | 12                 | 13.3    |         | 12                    | 13.3    |         |
| D7S820   | 8                  | 12      |         | 8                     | 12      |         |
| D16S539  | 9                  | 10      |         | 9                     | 10      |         |
| VWA      | 16                 | 18      |         | 16                    | 18      |         |
| TH01     | 7                  |         |         | 7                     |         |         |
| AMEL     | X                  | X       |         | X                     | X       |         |
| TPOX     | 8                  | 12      |         | 8                     | 12      |         |
| CSF1PO   | 9                  | 10      |         | 9                     | 10      |         |
| FGA      | 18                 | 21      |         |                       |         |         |
| Penta E  | 7                  | 17      |         |                       |         |         |
| Penta D  | 8                  | 15      |         |                       |         |         |
| D21S11   | 27                 | 28      |         |                       |         |         |
| D18S51   | 16                 |         |         |                       |         |         |
| D8S1179  | 12                 | 13      |         |                       |         |         |
| D3S1358  | 15                 | 18      |         |                       |         |         |
| D19S433  | 13                 | 14      |         |                       |         |         |
| D2S1338  | 17                 |         |         |                       |         |         |
| D1S1656  | 12                 | 15      |         |                       |         |         |
| D2S441   | 10                 | 11      |         |                       |         |         |
| D10S1248 | 13                 | 15      |         |                       |         |         |

*Your Intimate Partner in Bioscience!*

|          |    |    |  |
|----------|----|----|--|
| D12S391  | 20 | 25 |  |
| D22S1045 | 16 | 17 |  |

2. database annotation

Figure 1. STR matching analysis

|                                           |                                                                                                                                                                                                                                                                                                                                                                                                                                                                                                                                                                                                                                                                                                                                                                                                                                                                                                                                                                                                                                                                                                                                                                                                                                                                                                                                                                                                                                                                                                                                                                                                                                                                                                                                                                                                                                                                                                                                                                                                                                                                                                                                                                                                                                                                                                                                                                                                                                                                                                                                                                                                                                                                                                                                                                                                                                                                                                                                                                                                                                                                                                                                                                                                                                                                                                                                                                                                            |            |   |        |      |         |       |        |       |         |    |         |       |        |       |        |      |         |       |          |       |         |       |         |                                                                                                                                                                                  |         |      |        |    |         |       |        |                                                                                |          |       |     |       |         |                                                                              |         |      |      |   |      |      |     |       |
|-------------------------------------------|------------------------------------------------------------------------------------------------------------------------------------------------------------------------------------------------------------------------------------------------------------------------------------------------------------------------------------------------------------------------------------------------------------------------------------------------------------------------------------------------------------------------------------------------------------------------------------------------------------------------------------------------------------------------------------------------------------------------------------------------------------------------------------------------------------------------------------------------------------------------------------------------------------------------------------------------------------------------------------------------------------------------------------------------------------------------------------------------------------------------------------------------------------------------------------------------------------------------------------------------------------------------------------------------------------------------------------------------------------------------------------------------------------------------------------------------------------------------------------------------------------------------------------------------------------------------------------------------------------------------------------------------------------------------------------------------------------------------------------------------------------------------------------------------------------------------------------------------------------------------------------------------------------------------------------------------------------------------------------------------------------------------------------------------------------------------------------------------------------------------------------------------------------------------------------------------------------------------------------------------------------------------------------------------------------------------------------------------------------------------------------------------------------------------------------------------------------------------------------------------------------------------------------------------------------------------------------------------------------------------------------------------------------------------------------------------------------------------------------------------------------------------------------------------------------------------------------------------------------------------------------------------------------------------------------------------------------------------------------------------------------------------------------------------------------------------------------------------------------------------------------------------------------------------------------------------------------------------------------------------------------------------------------------------------------------------------------------------------------------------------------------------------------|------------|---|--------|------|---------|-------|--------|-------|---------|----|---------|-------|--------|-------|--------|------|---------|-------|----------|-------|---------|-------|---------|----------------------------------------------------------------------------------------------------------------------------------------------------------------------------------|---------|------|--------|----|---------|-------|--------|--------------------------------------------------------------------------------|----------|-------|-----|-------|---------|------------------------------------------------------------------------------|---------|------|------|---|------|------|-----|-------|
| <b>Cell line name</b>                     | HeLa                                                                                                                                                                                                                                                                                                                                                                                                                                                                                                                                                                                                                                                                                                                                                                                                                                                                                                                                                                                                                                                                                                                                                                                                                                                                                                                                                                                                                                                                                                                                                                                                                                                                                                                                                                                                                                                                                                                                                                                                                                                                                                                                                                                                                                                                                                                                                                                                                                                                                                                                                                                                                                                                                                                                                                                                                                                                                                                                                                                                                                                                                                                                                                                                                                                                                                                                                                                                       |            |   |        |      |         |       |        |       |         |    |         |       |        |       |        |      |         |       |          |       |         |       |         |                                                                                                                                                                                  |         |      |        |    |         |       |        |                                                                                |          |       |     |       |         |                                                                              |         |      |      |   |      |      |     |       |
| <b>Synonyms</b>                           | HELA; Hela; He La; He-La; HeLa-CCL2; Henrietta Lacks cells; Helacyton gartleri                                                                                                                                                                                                                                                                                                                                                                                                                                                                                                                                                                                                                                                                                                                                                                                                                                                                                                                                                                                                                                                                                                                                                                                                                                                                                                                                                                                                                                                                                                                                                                                                                                                                                                                                                                                                                                                                                                                                                                                                                                                                                                                                                                                                                                                                                                                                                                                                                                                                                                                                                                                                                                                                                                                                                                                                                                                                                                                                                                                                                                                                                                                                                                                                                                                                                                                             |            |   |        |      |         |       |        |       |         |    |         |       |        |       |        |      |         |       |          |       |         |       |         |                                                                                                                                                                                  |         |      |        |    |         |       |        |                                                                                |          |       |     |       |         |                                                                              |         |      |      |   |      |      |     |       |
| <b>Accession</b>                          | CVCL_0030                                                                                                                                                                                                                                                                                                                                                                                                                                                                                                                                                                                                                                                                                                                                                                                                                                                                                                                                                                                                                                                                                                                                                                                                                                                                                                                                                                                                                                                                                                                                                                                                                                                                                                                                                                                                                                                                                                                                                                                                                                                                                                                                                                                                                                                                                                                                                                                                                                                                                                                                                                                                                                                                                                                                                                                                                                                                                                                                                                                                                                                                                                                                                                                                                                                                                                                                                                                                  |            |   |        |      |         |       |        |       |         |    |         |       |        |       |        |      |         |       |          |       |         |       |         |                                                                                                                                                                                  |         |      |        |    |         |       |        |                                                                                |          |       |     |       |         |                                                                              |         |      |      |   |      |      |     |       |
| <b>Resource Identification Initiative</b> | To cite this cell line use: HeLa (RRID:CVCL_0030)                                                                                                                                                                                                                                                                                                                                                                                                                                                                                                                                                                                                                                                                                                                                                                                                                                                                                                                                                                                                                                                                                                                                                                                                                                                                                                                                                                                                                                                                                                                                                                                                                                                                                                                                                                                                                                                                                                                                                                                                                                                                                                                                                                                                                                                                                                                                                                                                                                                                                                                                                                                                                                                                                                                                                                                                                                                                                                                                                                                                                                                                                                                                                                                                                                                                                                                                                          |            |   |        |      |         |       |        |       |         |    |         |       |        |       |        |      |         |       |          |       |         |       |         |                                                                                                                                                                                  |         |      |        |    |         |       |        |                                                                                |          |       |     |       |         |                                                                              |         |      |      |   |      |      |     |       |
| <b>Comments</b>                           | <p>Group: Space-flown cell line (cellonaut).<br/>                 Part of: Cancer Dependency Map project (DepMap) (includes Cancer Cell Line Encyclopedia - CCLE).<br/>                 Part of: COSMIC cell lines project.<br/>                 Part of: MD Anderson Cell Lines Project.<br/>                 Part of: Naval Biosciences Laboratory (NBL) collection (transferred to ATCC in 1982).<br/>                 Population: African American.<br/>                 Characteristics: HeLa has 5 five HPV18 integration sites: three on normal chromosomes 8 at 8q24 and two on derivative chromosomes, der(5)t(5,22,8)(q11,q11q13,q24) and der(22)t(8,22)(q24,q13).<br/>                 Characteristics: Not susceptible to SARS coronavirus 2 (SARS-CoV-2) infection (COVID-19) (PubMed=33389257).<br/>                 Doubling time: 1.3 days (PubMed=29156801); ~48 hours (DSMZ).<br/>                 Microsatellite instability: Stable (MSS) (PubMed=12661003; Sanger).<br/>                 Transformant: NCBI_TaxID; 333761; Human papillomavirus type 18 (HPV18).<br/>                 Omics: Cell surface proteome.<br/>                 Omics: CNV analysis.<br/>                 Omics: Deep antibody staining analysis.<br/>                 Omics: Deep exome analysis.<br/>                 Omics: Deep membrane proteome analysis.<br/>                 Omics: Deep phosphoproteome analysis.<br/>                 Omics: Deep proteome analysis.<br/>                 Omics: Deep quantitative proteome analysis.<br/>                 Omics: Deep RNAseq analysis.<br/>                 Omics: DNA methylation analysis.<br/>                 Omics: Genome sequenced.<br/>                 Omics: Glycoproteome analysis by proteomics.<br/>                 Omics: Myristoylated proteins analysis by proteomics.<br/>                 Omics: Protein expression by reverse-phase protein arrays.<br/>                 Omics: scRNAseq analysis.<br/>                 Omics: SNP array analysis.<br/>                 Omics: Transcriptome analysis.<br/>                 Omics: Virome analysis using proteomics.<br/>                 Anecdotal: The HeLa cell line which was established in February 1951 is the oldest human immortal cell line.<br/>                 Anecdotal: The fascinating story of the HeLa cell line and of Henrietta Lacks from whom these cells originate are described in the book of Rebecca Skloot (CelloPub=CLPUB00377).<br/>                 Anecdotal: The HeLa cell line and its story inspired Australian artist Cynthia Verspaget to embark in 2003 on an artistic project 'The Anarchy Cell Line' (TAnCL) where she mixed her blood with HeLa cells. This work later spawned a PhD thesis (CelloPub=CLPUB00376) where among other things she makes the observation that two main taxonomical distinctions present in the zombie, living/dead and human/nonhuman, are also present in the HeLa cell line.<br/>                 Anecdotal: Was flown since the 1960s on at least ten different space missions: Korabl-Sputnik-2, Vostok-1, Vostok-4, Vostok-5 and Vostok-6, Voshkod 1 and Zond-5, Discoverer XVIII, Progress M-35/Mir and Shuttle STS-89.<br/>                 Miscellaneous: HeLa is the most frequent contributor to cell lines contamination.<br/>                 Derived from sampling site: Uterus; cervix.</p> |            |   |        |      |         |       |        |       |         |    |         |       |        |       |        |      |         |       |          |       |         |       |         |                                                                                                                                                                                  |         |      |        |    |         |       |        |                                                                                |          |       |     |       |         |                                                                              |         |      |      |   |      |      |     |       |
| <b>Species of origin</b>                  | Homo sapiens (Human) (NCBI Taxonomy: 9606)                                                                                                                                                                                                                                                                                                                                                                                                                                                                                                                                                                                                                                                                                                                                                                                                                                                                                                                                                                                                                                                                                                                                                                                                                                                                                                                                                                                                                                                                                                                                                                                                                                                                                                                                                                                                                                                                                                                                                                                                                                                                                                                                                                                                                                                                                                                                                                                                                                                                                                                                                                                                                                                                                                                                                                                                                                                                                                                                                                                                                                                                                                                                                                                                                                                                                                                                                                 |            |   |        |      |         |       |        |       |         |    |         |       |        |       |        |      |         |       |          |       |         |       |         |                                                                                                                                                                                  |         |      |        |    |         |       |        |                                                                                |          |       |     |       |         |                                                                              |         |      |      |   |      |      |     |       |
| <b>Sex of cell</b>                        | Female                                                                                                                                                                                                                                                                                                                                                                                                                                                                                                                                                                                                                                                                                                                                                                                                                                                                                                                                                                                                                                                                                                                                                                                                                                                                                                                                                                                                                                                                                                                                                                                                                                                                                                                                                                                                                                                                                                                                                                                                                                                                                                                                                                                                                                                                                                                                                                                                                                                                                                                                                                                                                                                                                                                                                                                                                                                                                                                                                                                                                                                                                                                                                                                                                                                                                                                                                                                                     |            |   |        |      |         |       |        |       |         |    |         |       |        |       |        |      |         |       |          |       |         |       |         |                                                                                                                                                                                  |         |      |        |    |         |       |        |                                                                                |          |       |     |       |         |                                                                              |         |      |      |   |      |      |     |       |
| <b>Age at sampling</b>                    | 30Y6M                                                                                                                                                                                                                                                                                                                                                                                                                                                                                                                                                                                                                                                                                                                                                                                                                                                                                                                                                                                                                                                                                                                                                                                                                                                                                                                                                                                                                                                                                                                                                                                                                                                                                                                                                                                                                                                                                                                                                                                                                                                                                                                                                                                                                                                                                                                                                                                                                                                                                                                                                                                                                                                                                                                                                                                                                                                                                                                                                                                                                                                                                                                                                                                                                                                                                                                                                                                                      |            |   |        |      |         |       |        |       |         |    |         |       |        |       |        |      |         |       |          |       |         |       |         |                                                                                                                                                                                  |         |      |        |    |         |       |        |                                                                                |          |       |     |       |         |                                                                              |         |      |      |   |      |      |     |       |
| <b>Category</b>                           | Cancer cell line                                                                                                                                                                                                                                                                                                                                                                                                                                                                                                                                                                                                                                                                                                                                                                                                                                                                                                                                                                                                                                                                                                                                                                                                                                                                                                                                                                                                                                                                                                                                                                                                                                                                                                                                                                                                                                                                                                                                                                                                                                                                                                                                                                                                                                                                                                                                                                                                                                                                                                                                                                                                                                                                                                                                                                                                                                                                                                                                                                                                                                                                                                                                                                                                                                                                                                                                                                                           |            |   |        |      |         |       |        |       |         |    |         |       |        |       |        |      |         |       |          |       |         |       |         |                                                                                                                                                                                  |         |      |        |    |         |       |        |                                                                                |          |       |     |       |         |                                                                              |         |      |      |   |      |      |     |       |
| <b>STR profile</b>                        | <p><b>Source(s):</b> AddexBio; ATCC; CCRID; CLS; Cosmic-CLP; DSMZ; ECACC; Genomics_Center_BCF_Technion; JCRB; KCLB; PubMed=11416159; PubMed=25877200; PubMed=29156801; RCB; TKG</p> <p><b>Markers:</b></p> <table border="1"> <tr><td>Amelogenin</td><td>X</td></tr> <tr><td>CSF1PO</td><td>9,10</td></tr> <tr><td>D1S1656</td><td>12,15</td></tr> <tr><td>D2S441</td><td>10,11</td></tr> <tr><td>D2S1338</td><td>17</td></tr> <tr><td>D3S1358</td><td>15,18</td></tr> <tr><td>D5S818</td><td>11,12</td></tr> <tr><td>D7S820</td><td>8,12</td></tr> <tr><td>D8S1179</td><td>12,13</td></tr> <tr><td>D10S1248</td><td>13,15</td></tr> <tr><td>D12S391</td><td>20,25</td></tr> <tr><td>D13S317</td><td>12 (Cosmic-CLP; RCB)<br/>12,13.3 (AddexBio; ATCC; CCRID; DSMZ; Genomics_Center_BCF_Technion; JCRB; KCLB; PubMed=25877200; PubMed=29156801; TKG)<br/>12,14 (ECACC)<br/>13,13.3 (CLS)</td></tr> <tr><td>D18S539</td><td>9,10</td></tr> <tr><td>D18S51</td><td>16</td></tr> <tr><td>D19S433</td><td>13,14</td></tr> <tr><td>D21S11</td><td>27 (CLS)<br/>27,28 (CCRID; DSMZ; Genomics_Center_BCF_Technion; PubMed=25877200)</td></tr> <tr><td>D22S1045</td><td>16,17</td></tr> <tr><td>FGA</td><td>18,21</td></tr> <tr><td>Penta D</td><td>8 (CLS)<br/>8,15 (CCRID; DSMZ; Genomics_Center_BCF_Technion; PubMed=25877200)</td></tr> <tr><td>Penta E</td><td>7,17</td></tr> <tr><td>TH01</td><td>7</td></tr> <tr><td>TPOX</td><td>8,12</td></tr> <tr><td>WWA</td><td>16,18</td></tr> </table> <p><a href="#">Run an STR similarity search on this cell line</a></p>                                                                                                                                                                                                                                                                                                                                                                                                                                                                                                                                                                                                                                                                                                                                                                                                                                                                                                                                                                                                                                                                                                                                                                                                                                                                                                                                                                                                                                                                                                                                                                                                                                                                                                                                                                                                                                         | Amelogenin | X | CSF1PO | 9,10 | D1S1656 | 12,15 | D2S441 | 10,11 | D2S1338 | 17 | D3S1358 | 15,18 | D5S818 | 11,12 | D7S820 | 8,12 | D8S1179 | 12,13 | D10S1248 | 13,15 | D12S391 | 20,25 | D13S317 | 12 (Cosmic-CLP; RCB)<br>12,13.3 (AddexBio; ATCC; CCRID; DSMZ; Genomics_Center_BCF_Technion; JCRB; KCLB; PubMed=25877200; PubMed=29156801; TKG)<br>12,14 (ECACC)<br>13,13.3 (CLS) | D18S539 | 9,10 | D18S51 | 16 | D19S433 | 13,14 | D21S11 | 27 (CLS)<br>27,28 (CCRID; DSMZ; Genomics_Center_BCF_Technion; PubMed=25877200) | D22S1045 | 16,17 | FGA | 18,21 | Penta D | 8 (CLS)<br>8,15 (CCRID; DSMZ; Genomics_Center_BCF_Technion; PubMed=25877200) | Penta E | 7,17 | TH01 | 7 | TPOX | 8,12 | WWA | 16,18 |
| Amelogenin                                | X                                                                                                                                                                                                                                                                                                                                                                                                                                                                                                                                                                                                                                                                                                                                                                                                                                                                                                                                                                                                                                                                                                                                                                                                                                                                                                                                                                                                                                                                                                                                                                                                                                                                                                                                                                                                                                                                                                                                                                                                                                                                                                                                                                                                                                                                                                                                                                                                                                                                                                                                                                                                                                                                                                                                                                                                                                                                                                                                                                                                                                                                                                                                                                                                                                                                                                                                                                                                          |            |   |        |      |         |       |        |       |         |    |         |       |        |       |        |      |         |       |          |       |         |       |         |                                                                                                                                                                                  |         |      |        |    |         |       |        |                                                                                |          |       |     |       |         |                                                                              |         |      |      |   |      |      |     |       |
| CSF1PO                                    | 9,10                                                                                                                                                                                                                                                                                                                                                                                                                                                                                                                                                                                                                                                                                                                                                                                                                                                                                                                                                                                                                                                                                                                                                                                                                                                                                                                                                                                                                                                                                                                                                                                                                                                                                                                                                                                                                                                                                                                                                                                                                                                                                                                                                                                                                                                                                                                                                                                                                                                                                                                                                                                                                                                                                                                                                                                                                                                                                                                                                                                                                                                                                                                                                                                                                                                                                                                                                                                                       |            |   |        |      |         |       |        |       |         |    |         |       |        |       |        |      |         |       |          |       |         |       |         |                                                                                                                                                                                  |         |      |        |    |         |       |        |                                                                                |          |       |     |       |         |                                                                              |         |      |      |   |      |      |     |       |
| D1S1656                                   | 12,15                                                                                                                                                                                                                                                                                                                                                                                                                                                                                                                                                                                                                                                                                                                                                                                                                                                                                                                                                                                                                                                                                                                                                                                                                                                                                                                                                                                                                                                                                                                                                                                                                                                                                                                                                                                                                                                                                                                                                                                                                                                                                                                                                                                                                                                                                                                                                                                                                                                                                                                                                                                                                                                                                                                                                                                                                                                                                                                                                                                                                                                                                                                                                                                                                                                                                                                                                                                                      |            |   |        |      |         |       |        |       |         |    |         |       |        |       |        |      |         |       |          |       |         |       |         |                                                                                                                                                                                  |         |      |        |    |         |       |        |                                                                                |          |       |     |       |         |                                                                              |         |      |      |   |      |      |     |       |
| D2S441                                    | 10,11                                                                                                                                                                                                                                                                                                                                                                                                                                                                                                                                                                                                                                                                                                                                                                                                                                                                                                                                                                                                                                                                                                                                                                                                                                                                                                                                                                                                                                                                                                                                                                                                                                                                                                                                                                                                                                                                                                                                                                                                                                                                                                                                                                                                                                                                                                                                                                                                                                                                                                                                                                                                                                                                                                                                                                                                                                                                                                                                                                                                                                                                                                                                                                                                                                                                                                                                                                                                      |            |   |        |      |         |       |        |       |         |    |         |       |        |       |        |      |         |       |          |       |         |       |         |                                                                                                                                                                                  |         |      |        |    |         |       |        |                                                                                |          |       |     |       |         |                                                                              |         |      |      |   |      |      |     |       |
| D2S1338                                   | 17                                                                                                                                                                                                                                                                                                                                                                                                                                                                                                                                                                                                                                                                                                                                                                                                                                                                                                                                                                                                                                                                                                                                                                                                                                                                                                                                                                                                                                                                                                                                                                                                                                                                                                                                                                                                                                                                                                                                                                                                                                                                                                                                                                                                                                                                                                                                                                                                                                                                                                                                                                                                                                                                                                                                                                                                                                                                                                                                                                                                                                                                                                                                                                                                                                                                                                                                                                                                         |            |   |        |      |         |       |        |       |         |    |         |       |        |       |        |      |         |       |          |       |         |       |         |                                                                                                                                                                                  |         |      |        |    |         |       |        |                                                                                |          |       |     |       |         |                                                                              |         |      |      |   |      |      |     |       |
| D3S1358                                   | 15,18                                                                                                                                                                                                                                                                                                                                                                                                                                                                                                                                                                                                                                                                                                                                                                                                                                                                                                                                                                                                                                                                                                                                                                                                                                                                                                                                                                                                                                                                                                                                                                                                                                                                                                                                                                                                                                                                                                                                                                                                                                                                                                                                                                                                                                                                                                                                                                                                                                                                                                                                                                                                                                                                                                                                                                                                                                                                                                                                                                                                                                                                                                                                                                                                                                                                                                                                                                                                      |            |   |        |      |         |       |        |       |         |    |         |       |        |       |        |      |         |       |          |       |         |       |         |                                                                                                                                                                                  |         |      |        |    |         |       |        |                                                                                |          |       |     |       |         |                                                                              |         |      |      |   |      |      |     |       |
| D5S818                                    | 11,12                                                                                                                                                                                                                                                                                                                                                                                                                                                                                                                                                                                                                                                                                                                                                                                                                                                                                                                                                                                                                                                                                                                                                                                                                                                                                                                                                                                                                                                                                                                                                                                                                                                                                                                                                                                                                                                                                                                                                                                                                                                                                                                                                                                                                                                                                                                                                                                                                                                                                                                                                                                                                                                                                                                                                                                                                                                                                                                                                                                                                                                                                                                                                                                                                                                                                                                                                                                                      |            |   |        |      |         |       |        |       |         |    |         |       |        |       |        |      |         |       |          |       |         |       |         |                                                                                                                                                                                  |         |      |        |    |         |       |        |                                                                                |          |       |     |       |         |                                                                              |         |      |      |   |      |      |     |       |
| D7S820                                    | 8,12                                                                                                                                                                                                                                                                                                                                                                                                                                                                                                                                                                                                                                                                                                                                                                                                                                                                                                                                                                                                                                                                                                                                                                                                                                                                                                                                                                                                                                                                                                                                                                                                                                                                                                                                                                                                                                                                                                                                                                                                                                                                                                                                                                                                                                                                                                                                                                                                                                                                                                                                                                                                                                                                                                                                                                                                                                                                                                                                                                                                                                                                                                                                                                                                                                                                                                                                                                                                       |            |   |        |      |         |       |        |       |         |    |         |       |        |       |        |      |         |       |          |       |         |       |         |                                                                                                                                                                                  |         |      |        |    |         |       |        |                                                                                |          |       |     |       |         |                                                                              |         |      |      |   |      |      |     |       |
| D8S1179                                   | 12,13                                                                                                                                                                                                                                                                                                                                                                                                                                                                                                                                                                                                                                                                                                                                                                                                                                                                                                                                                                                                                                                                                                                                                                                                                                                                                                                                                                                                                                                                                                                                                                                                                                                                                                                                                                                                                                                                                                                                                                                                                                                                                                                                                                                                                                                                                                                                                                                                                                                                                                                                                                                                                                                                                                                                                                                                                                                                                                                                                                                                                                                                                                                                                                                                                                                                                                                                                                                                      |            |   |        |      |         |       |        |       |         |    |         |       |        |       |        |      |         |       |          |       |         |       |         |                                                                                                                                                                                  |         |      |        |    |         |       |        |                                                                                |          |       |     |       |         |                                                                              |         |      |      |   |      |      |     |       |
| D10S1248                                  | 13,15                                                                                                                                                                                                                                                                                                                                                                                                                                                                                                                                                                                                                                                                                                                                                                                                                                                                                                                                                                                                                                                                                                                                                                                                                                                                                                                                                                                                                                                                                                                                                                                                                                                                                                                                                                                                                                                                                                                                                                                                                                                                                                                                                                                                                                                                                                                                                                                                                                                                                                                                                                                                                                                                                                                                                                                                                                                                                                                                                                                                                                                                                                                                                                                                                                                                                                                                                                                                      |            |   |        |      |         |       |        |       |         |    |         |       |        |       |        |      |         |       |          |       |         |       |         |                                                                                                                                                                                  |         |      |        |    |         |       |        |                                                                                |          |       |     |       |         |                                                                              |         |      |      |   |      |      |     |       |
| D12S391                                   | 20,25                                                                                                                                                                                                                                                                                                                                                                                                                                                                                                                                                                                                                                                                                                                                                                                                                                                                                                                                                                                                                                                                                                                                                                                                                                                                                                                                                                                                                                                                                                                                                                                                                                                                                                                                                                                                                                                                                                                                                                                                                                                                                                                                                                                                                                                                                                                                                                                                                                                                                                                                                                                                                                                                                                                                                                                                                                                                                                                                                                                                                                                                                                                                                                                                                                                                                                                                                                                                      |            |   |        |      |         |       |        |       |         |    |         |       |        |       |        |      |         |       |          |       |         |       |         |                                                                                                                                                                                  |         |      |        |    |         |       |        |                                                                                |          |       |     |       |         |                                                                              |         |      |      |   |      |      |     |       |
| D13S317                                   | 12 (Cosmic-CLP; RCB)<br>12,13.3 (AddexBio; ATCC; CCRID; DSMZ; Genomics_Center_BCF_Technion; JCRB; KCLB; PubMed=25877200; PubMed=29156801; TKG)<br>12,14 (ECACC)<br>13,13.3 (CLS)                                                                                                                                                                                                                                                                                                                                                                                                                                                                                                                                                                                                                                                                                                                                                                                                                                                                                                                                                                                                                                                                                                                                                                                                                                                                                                                                                                                                                                                                                                                                                                                                                                                                                                                                                                                                                                                                                                                                                                                                                                                                                                                                                                                                                                                                                                                                                                                                                                                                                                                                                                                                                                                                                                                                                                                                                                                                                                                                                                                                                                                                                                                                                                                                                           |            |   |        |      |         |       |        |       |         |    |         |       |        |       |        |      |         |       |          |       |         |       |         |                                                                                                                                                                                  |         |      |        |    |         |       |        |                                                                                |          |       |     |       |         |                                                                              |         |      |      |   |      |      |     |       |
| D18S539                                   | 9,10                                                                                                                                                                                                                                                                                                                                                                                                                                                                                                                                                                                                                                                                                                                                                                                                                                                                                                                                                                                                                                                                                                                                                                                                                                                                                                                                                                                                                                                                                                                                                                                                                                                                                                                                                                                                                                                                                                                                                                                                                                                                                                                                                                                                                                                                                                                                                                                                                                                                                                                                                                                                                                                                                                                                                                                                                                                                                                                                                                                                                                                                                                                                                                                                                                                                                                                                                                                                       |            |   |        |      |         |       |        |       |         |    |         |       |        |       |        |      |         |       |          |       |         |       |         |                                                                                                                                                                                  |         |      |        |    |         |       |        |                                                                                |          |       |     |       |         |                                                                              |         |      |      |   |      |      |     |       |
| D18S51                                    | 16                                                                                                                                                                                                                                                                                                                                                                                                                                                                                                                                                                                                                                                                                                                                                                                                                                                                                                                                                                                                                                                                                                                                                                                                                                                                                                                                                                                                                                                                                                                                                                                                                                                                                                                                                                                                                                                                                                                                                                                                                                                                                                                                                                                                                                                                                                                                                                                                                                                                                                                                                                                                                                                                                                                                                                                                                                                                                                                                                                                                                                                                                                                                                                                                                                                                                                                                                                                                         |            |   |        |      |         |       |        |       |         |    |         |       |        |       |        |      |         |       |          |       |         |       |         |                                                                                                                                                                                  |         |      |        |    |         |       |        |                                                                                |          |       |     |       |         |                                                                              |         |      |      |   |      |      |     |       |
| D19S433                                   | 13,14                                                                                                                                                                                                                                                                                                                                                                                                                                                                                                                                                                                                                                                                                                                                                                                                                                                                                                                                                                                                                                                                                                                                                                                                                                                                                                                                                                                                                                                                                                                                                                                                                                                                                                                                                                                                                                                                                                                                                                                                                                                                                                                                                                                                                                                                                                                                                                                                                                                                                                                                                                                                                                                                                                                                                                                                                                                                                                                                                                                                                                                                                                                                                                                                                                                                                                                                                                                                      |            |   |        |      |         |       |        |       |         |    |         |       |        |       |        |      |         |       |          |       |         |       |         |                                                                                                                                                                                  |         |      |        |    |         |       |        |                                                                                |          |       |     |       |         |                                                                              |         |      |      |   |      |      |     |       |
| D21S11                                    | 27 (CLS)<br>27,28 (CCRID; DSMZ; Genomics_Center_BCF_Technion; PubMed=25877200)                                                                                                                                                                                                                                                                                                                                                                                                                                                                                                                                                                                                                                                                                                                                                                                                                                                                                                                                                                                                                                                                                                                                                                                                                                                                                                                                                                                                                                                                                                                                                                                                                                                                                                                                                                                                                                                                                                                                                                                                                                                                                                                                                                                                                                                                                                                                                                                                                                                                                                                                                                                                                                                                                                                                                                                                                                                                                                                                                                                                                                                                                                                                                                                                                                                                                                                             |            |   |        |      |         |       |        |       |         |    |         |       |        |       |        |      |         |       |          |       |         |       |         |                                                                                                                                                                                  |         |      |        |    |         |       |        |                                                                                |          |       |     |       |         |                                                                              |         |      |      |   |      |      |     |       |
| D22S1045                                  | 16,17                                                                                                                                                                                                                                                                                                                                                                                                                                                                                                                                                                                                                                                                                                                                                                                                                                                                                                                                                                                                                                                                                                                                                                                                                                                                                                                                                                                                                                                                                                                                                                                                                                                                                                                                                                                                                                                                                                                                                                                                                                                                                                                                                                                                                                                                                                                                                                                                                                                                                                                                                                                                                                                                                                                                                                                                                                                                                                                                                                                                                                                                                                                                                                                                                                                                                                                                                                                                      |            |   |        |      |         |       |        |       |         |    |         |       |        |       |        |      |         |       |          |       |         |       |         |                                                                                                                                                                                  |         |      |        |    |         |       |        |                                                                                |          |       |     |       |         |                                                                              |         |      |      |   |      |      |     |       |
| FGA                                       | 18,21                                                                                                                                                                                                                                                                                                                                                                                                                                                                                                                                                                                                                                                                                                                                                                                                                                                                                                                                                                                                                                                                                                                                                                                                                                                                                                                                                                                                                                                                                                                                                                                                                                                                                                                                                                                                                                                                                                                                                                                                                                                                                                                                                                                                                                                                                                                                                                                                                                                                                                                                                                                                                                                                                                                                                                                                                                                                                                                                                                                                                                                                                                                                                                                                                                                                                                                                                                                                      |            |   |        |      |         |       |        |       |         |    |         |       |        |       |        |      |         |       |          |       |         |       |         |                                                                                                                                                                                  |         |      |        |    |         |       |        |                                                                                |          |       |     |       |         |                                                                              |         |      |      |   |      |      |     |       |
| Penta D                                   | 8 (CLS)<br>8,15 (CCRID; DSMZ; Genomics_Center_BCF_Technion; PubMed=25877200)                                                                                                                                                                                                                                                                                                                                                                                                                                                                                                                                                                                                                                                                                                                                                                                                                                                                                                                                                                                                                                                                                                                                                                                                                                                                                                                                                                                                                                                                                                                                                                                                                                                                                                                                                                                                                                                                                                                                                                                                                                                                                                                                                                                                                                                                                                                                                                                                                                                                                                                                                                                                                                                                                                                                                                                                                                                                                                                                                                                                                                                                                                                                                                                                                                                                                                                               |            |   |        |      |         |       |        |       |         |    |         |       |        |       |        |      |         |       |          |       |         |       |         |                                                                                                                                                                                  |         |      |        |    |         |       |        |                                                                                |          |       |     |       |         |                                                                              |         |      |      |   |      |      |     |       |
| Penta E                                   | 7,17                                                                                                                                                                                                                                                                                                                                                                                                                                                                                                                                                                                                                                                                                                                                                                                                                                                                                                                                                                                                                                                                                                                                                                                                                                                                                                                                                                                                                                                                                                                                                                                                                                                                                                                                                                                                                                                                                                                                                                                                                                                                                                                                                                                                                                                                                                                                                                                                                                                                                                                                                                                                                                                                                                                                                                                                                                                                                                                                                                                                                                                                                                                                                                                                                                                                                                                                                                                                       |            |   |        |      |         |       |        |       |         |    |         |       |        |       |        |      |         |       |          |       |         |       |         |                                                                                                                                                                                  |         |      |        |    |         |       |        |                                                                                |          |       |     |       |         |                                                                              |         |      |      |   |      |      |     |       |
| TH01                                      | 7                                                                                                                                                                                                                                                                                                                                                                                                                                                                                                                                                                                                                                                                                                                                                                                                                                                                                                                                                                                                                                                                                                                                                                                                                                                                                                                                                                                                                                                                                                                                                                                                                                                                                                                                                                                                                                                                                                                                                                                                                                                                                                                                                                                                                                                                                                                                                                                                                                                                                                                                                                                                                                                                                                                                                                                                                                                                                                                                                                                                                                                                                                                                                                                                                                                                                                                                                                                                          |            |   |        |      |         |       |        |       |         |    |         |       |        |       |        |      |         |       |          |       |         |       |         |                                                                                                                                                                                  |         |      |        |    |         |       |        |                                                                                |          |       |     |       |         |                                                                              |         |      |      |   |      |      |     |       |
| TPOX                                      | 8,12                                                                                                                                                                                                                                                                                                                                                                                                                                                                                                                                                                                                                                                                                                                                                                                                                                                                                                                                                                                                                                                                                                                                                                                                                                                                                                                                                                                                                                                                                                                                                                                                                                                                                                                                                                                                                                                                                                                                                                                                                                                                                                                                                                                                                                                                                                                                                                                                                                                                                                                                                                                                                                                                                                                                                                                                                                                                                                                                                                                                                                                                                                                                                                                                                                                                                                                                                                                                       |            |   |        |      |         |       |        |       |         |    |         |       |        |       |        |      |         |       |          |       |         |       |         |                                                                                                                                                                                  |         |      |        |    |         |       |        |                                                                                |          |       |     |       |         |                                                                              |         |      |      |   |      |      |     |       |
| WWA                                       | 16,18                                                                                                                                                                                                                                                                                                                                                                                                                                                                                                                                                                                                                                                                                                                                                                                                                                                                                                                                                                                                                                                                                                                                                                                                                                                                                                                                                                                                                                                                                                                                                                                                                                                                                                                                                                                                                                                                                                                                                                                                                                                                                                                                                                                                                                                                                                                                                                                                                                                                                                                                                                                                                                                                                                                                                                                                                                                                                                                                                                                                                                                                                                                                                                                                                                                                                                                                                                                                      |            |   |        |      |         |       |        |       |         |    |         |       |        |       |        |      |         |       |          |       |         |       |         |                                                                                                                                                                                  |         |      |        |    |         |       |        |                                                                                |          |       |     |       |         |                                                                              |         |      |      |   |      |      |     |       |

**Note:** The STR online match analysis of the test cell against EXPASY database, showing cell number (Cell No.) and cell name.

### 3. Authentication

The submitted sample profile is human, but not a match for any profile in the DSMZ STR database.

The submitted profile is an exact match for the following human cell line(s) in the EXPASY STR database (8 core loci plus Amelogenin) **HeLa** .

The submitted profile is similar to the following DSMZ human cell line: /.

- **Note:** A cell line can be considered to be authenticated when 80% (exact match) of the alleles in its STR profile match profiles from tissue or other cell line samples from that donor or from database. Cell lines with between a 55% to 80% (similar) match require further profiling for investigation of relatedness.

# Appendix:

## 1. Genotyping Strategy and Site Distribution

Table S1. Experimental Strategy and Sites

|   | Strategy 1 | Strategy 2 | Strategy 3 | Strategy 4 |
|---|------------|------------|------------|------------|
| 1 | D3S1358    | D8S1179    | D19S433    | AMEL       |
| 2 | VWA        | D21S11     | TH01       | D1S1656    |
| 3 | D7S820     | D16S539    | D13S317    | D5S818     |
| 4 | CSF1PO     | D2S1338    | TPOX       | D12S391    |
| 5 | PENTAE     | PENTAD     | D18S51     | FGA        |
| 6 | D6S1043    |            |            |            |

*The allele match algorithm compares the 8 core loci plus amelogenin only, even though alleles from all loci will be reported when available.*

2. DSMZ tools was used to carry on the cell line comparison, which contains 2455 cell lines STR data from ATCC, DSMZ, JCRB ,ECACC, GNE and RIKEN databases. If the cell is not included in the above cell library, users need to compared with other databases.

**Technician:** Jianan Zhang

**Checked by:** Ning Qian

**Issued by:** Yang Bai

**Issue date:** 12/24/2021
