# Supplementary material for: PDHB-AS suppresses cervical cancer progression and cisplatin resistance via inhibition on Wnt/β-catenin pathway
Source: PubMed Central journal article supplement (PMC9905568; doi:10.1038/s41419-022-05547-5), 2023-02-07
Supplement: 41419_2022_5547_MOESM7_ESM.pdf [file 41419_2022_5547_MOESM7_ESM.pdf]

# Cell Line Authentication Service

---

## STR Profiling Report

**Sample From:** Guangdong Provincial  
People's Hospital

**Sample Type:** Cell Line

**Testing Method:** STR Genotyping

**Report Time:** 12/24/2021

## COMPANY STATEMENT

1. THIS REPORT IS ONLY RESPONSIBLE FOR THE SAMPLES ANALYZED.
2. THE TESTING RESULTS AND THE ORGANIZATION NAME WILL NOT BE USED FOR ADVERTISEMENT, COMMERCIAL EXHIBITIONS, COMMERCIAL PERFORMANCE AND OTHER COMMERCIAL ACTIVITIES.
3. OBJECTIONS SHOULD BE RAISED WITHIN FIFTEEN DAYS AFTER THE RECEIPT OF THIS REPORT.
4. THE PAPER REPORT WITH CONTENT ALTERING, ADDING OR WITHOUT THE STAMPED SEAL OF THE COMPANY ARE INVALID.

**Testing Company:** Shanghai Chenying Biotechnology Co. Ltd

**Address:** Room 502, NO.2 Zhongxing Creative Park, Lane 1015, Longteng Road, Songjiang District, Shanghai

**Tel:** +86-021-33559493

**Contact:** Wenyao Zhang

**E-mail:** market@biowing.com

## Cell Line Authentication – STR Profiling Report

### Sample code

Table 1. Sample Code

| Customer's code | Company Code |
|-----------------|--------------|
| ME-180          | 20211224-01  |

**Sample Number:** 1

**Sample Type:** Cell line

**Testing Type:** STR

**Testing Method:**

DNA was extracted by a commercial kit from CORNING (AP-EMN-BL-GDNA-250G). The twenty STRs including Amelogenin locus were amplified by six multiplex PCR and separated on ABI 3730XL Genetic Analyzer. The signals were then analyzed by the software GeneMapper.

### Data Interpretation:

Cell lines were authenticated using Short Tandem Repeat (STR) analysis as described in 2012 in ANSI Standard (ASN-0002) by the ATCC Standards Development Organization (SDO) and in Capes-Davis et al., Match criteria for human cell line authentication: Where do we draw the line? *Int J Cancer*.2013;132(11):2510-9.

# Test Results

## 1. STR profile

Table 2. STR and Amelogenin Genotyping Results of Cell line.

| Loci    | Sample information   |         |         | Cell Bank information   |         |         |
|---------|----------------------|---------|---------|-------------------------|---------|---------|
|         | Sample name : ME-180 |         |         | Cell line name : ME-180 |         |         |
|         | Allele1              | Allele2 | Allele3 | Allele1                 | Allele2 | Allele3 |
| D5S818  | 12                   |         |         | 12                      |         |         |
| D13S317 | 11                   | 13      |         | 11                      | 13      |         |
| D7S820  | 9                    | 10      |         | 9                       | 10      |         |
| D16S539 | 12                   | 13      |         | 12                      | 13      |         |
| VWA     | 15                   | 17      |         | 15                      | 17      |         |
| TH01    | 8                    | 9.3     |         | 8                       | 9.3     |         |
| AMEL    | X                    |         |         | X                       |         |         |
| TPOX    | 8                    | 10      |         | 8                       | 10      |         |
| CSF1PO  | 11                   |         |         | 11                      |         |         |
| FGA     | 23                   |         |         |                         |         |         |
| Penta E | 12                   | 14      |         |                         |         |         |
| Penta D | 9                    | 14      |         |                         |         |         |
| D21S11  | 30                   | 31      |         |                         |         |         |
| D18S51  | 12                   |         |         |                         |         |         |
| D8S1179 | 14                   |         |         |                         |         |         |
| D3S1358 | 16                   |         |         |                         |         |         |
| D19S433 | 13                   | 15.2    |         |                         |         |         |
| D2S1338 | 18                   |         |         |                         |         |         |

**2. database annotation**

Figure 1. STR matching analysis

|                                           |                                                                                                                                                                                                                                                                                                                                                                                                                                                                                                                                                                                                                                                                                                                                                                                                                                                                                                                                                                                                                                                                                                                                                                                                                                                                                                                                                         |            |   |        |    |         |    |         |    |        |    |        |      |         |    |         |                                                                                                                    |         |       |        |    |         |         |        |       |     |    |         |      |         |       |      |                                                                                                                |      |      |     |                                                                                                                       |
|-------------------------------------------|---------------------------------------------------------------------------------------------------------------------------------------------------------------------------------------------------------------------------------------------------------------------------------------------------------------------------------------------------------------------------------------------------------------------------------------------------------------------------------------------------------------------------------------------------------------------------------------------------------------------------------------------------------------------------------------------------------------------------------------------------------------------------------------------------------------------------------------------------------------------------------------------------------------------------------------------------------------------------------------------------------------------------------------------------------------------------------------------------------------------------------------------------------------------------------------------------------------------------------------------------------------------------------------------------------------------------------------------------------|------------|---|--------|----|---------|----|---------|----|--------|----|--------|------|---------|----|---------|--------------------------------------------------------------------------------------------------------------------|---------|-------|--------|----|---------|---------|--------|-------|-----|----|---------|------|---------|-------|------|----------------------------------------------------------------------------------------------------------------|------|------|-----|-----------------------------------------------------------------------------------------------------------------------|
| <b>Cell line name</b>                     | ME-180                                                                                                                                                                                                                                                                                                                                                                                                                                                                                                                                                                                                                                                                                                                                                                                                                                                                                                                                                                                                                                                                                                                                                                                                                                                                                                                                                  |            |   |        |    |         |    |         |    |        |    |        |      |         |    |         |                                                                                                                    |         |       |        |    |         |         |        |       |     |    |         |      |         |       |      |                                                                                                                |      |      |     |                                                                                                                       |
| <b>Synonyms</b>                           | Me-180; ME 180; ME180                                                                                                                                                                                                                                                                                                                                                                                                                                                                                                                                                                                                                                                                                                                                                                                                                                                                                                                                                                                                                                                                                                                                                                                                                                                                                                                                   |            |   |        |    |         |    |         |    |        |    |        |      |         |    |         |                                                                                                                    |         |       |        |    |         |         |        |       |     |    |         |      |         |       |      |                                                                                                                |      |      |     |                                                                                                                       |
| <b>Accession</b>                          | CVCL_1401                                                                                                                                                                                                                                                                                                                                                                                                                                                                                                                                                                                                                                                                                                                                                                                                                                                                                                                                                                                                                                                                                                                                                                                                                                                                                                                                               |            |   |        |    |         |    |         |    |        |    |        |      |         |    |         |                                                                                                                    |         |       |        |    |         |         |        |       |     |    |         |      |         |       |      |                                                                                                                |      |      |     |                                                                                                                       |
| <b>Resource Identification Initiative</b> | To cite this cell line use: ME-180 (RRID:CVCL_1401)                                                                                                                                                                                                                                                                                                                                                                                                                                                                                                                                                                                                                                                                                                                                                                                                                                                                                                                                                                                                                                                                                                                                                                                                                                                                                                     |            |   |        |    |         |    |         |    |        |    |        |      |         |    |         |                                                                                                                    |         |       |        |    |         |         |        |       |     |    |         |      |         |       |      |                                                                                                                |      |      |     |                                                                                                                       |
| <b>Comments</b>                           | Part of: Cancer Dependency Map project (DepMap) (includes Cancer Cell Line Encyclopedia - CCLE).<br>Part of: COSMIC cell lines project.<br>Part of: Naval Biosciences Laboratory (NBL) collection (transferred to ATCC in 1982).<br>Characteristics: Contains a complete HPV68 genome.<br>Doubling time: 1.5 days (PubMed=29156801).<br>Microsatellite instability: Stable (MSS) (Sanger).<br>Transformant: NCBI_TaxID; 45240; Human papillomavirus type 68 (HPV68).<br>Omics: Deep exome analysis.<br>Omics: Deep proteome analysis.<br>Omics: Deep RNAseq analysis.<br>Omics: DNA methylation analysis.<br>Omics: Protein expression by reverse-phase protein arrays.<br>Omics: SNP array analysis.<br>Omics: Transcriptome analysis.                                                                                                                                                                                                                                                                                                                                                                                                                                                                                                                                                                                                                 |            |   |        |    |         |    |         |    |        |    |        |      |         |    |         |                                                                                                                    |         |       |        |    |         |         |        |       |     |    |         |      |         |       |      |                                                                                                                |      |      |     |                                                                                                                       |
| <b>Species of origin</b>                  | Homo sapiens (Human) (NCBI Taxonomy: 9606)                                                                                                                                                                                                                                                                                                                                                                                                                                                                                                                                                                                                                                                                                                                                                                                                                                                                                                                                                                                                                                                                                                                                                                                                                                                                                                              |            |   |        |    |         |    |         |    |        |    |        |      |         |    |         |                                                                                                                    |         |       |        |    |         |         |        |       |     |    |         |      |         |       |      |                                                                                                                |      |      |     |                                                                                                                       |
| <b>Sex of cell</b>                        | Female                                                                                                                                                                                                                                                                                                                                                                                                                                                                                                                                                                                                                                                                                                                                                                                                                                                                                                                                                                                                                                                                                                                                                                                                                                                                                                                                                  |            |   |        |    |         |    |         |    |        |    |        |      |         |    |         |                                                                                                                    |         |       |        |    |         |         |        |       |     |    |         |      |         |       |      |                                                                                                                |      |      |     |                                                                                                                       |
| <b>Age at sampling</b>                    | 66Y                                                                                                                                                                                                                                                                                                                                                                                                                                                                                                                                                                                                                                                                                                                                                                                                                                                                                                                                                                                                                                                                                                                                                                                                                                                                                                                                                     |            |   |        |    |         |    |         |    |        |    |        |      |         |    |         |                                                                                                                    |         |       |        |    |         |         |        |       |     |    |         |      |         |       |      |                                                                                                                |      |      |     |                                                                                                                       |
| <b>Category</b>                           | Cancer cell line                                                                                                                                                                                                                                                                                                                                                                                                                                                                                                                                                                                                                                                                                                                                                                                                                                                                                                                                                                                                                                                                                                                                                                                                                                                                                                                                        |            |   |        |    |         |    |         |    |        |    |        |      |         |    |         |                                                                                                                    |         |       |        |    |         |         |        |       |     |    |         |      |         |       |      |                                                                                                                |      |      |     |                                                                                                                       |
| <b>STR profile</b>                        | <p><b>Source(s):</b> ATCC; CCRID; Cosmic-CLP; JCRB; KCLB; PubMed=22710073; PubMed=25877200; PubMed=29156801; RCB; TKG</p> <p><b>Markers:</b></p> <table border="1"> <tr> <td>Amelogenin</td> <td>X</td> </tr> <tr> <td>CSF1PO</td> <td>11</td> </tr> <tr> <td>D2S1338</td> <td>18</td> </tr> <tr> <td>D3S1358</td> <td>16</td> </tr> <tr> <td>D5S818</td> <td>12</td> </tr> <tr> <td>D7S820</td> <td>9,10</td> </tr> <tr> <td>D8S1179</td> <td>14</td> </tr> <tr> <td>D13S317</td> <td>11,12 (PubMed=22710073)<br/>11,13 (ATCC; CCRID; Cosmic-CLP; JCRB; KCLB; PubMed=25877200; PubMed=29156801; RCB; TKG)</td> </tr> <tr> <td>D16S539</td> <td>12,13</td> </tr> <tr> <td>D18S51</td> <td>12</td> </tr> <tr> <td>D19S433</td> <td>13,15.2</td> </tr> <tr> <td>D21S11</td> <td>30,31</td> </tr> <tr> <td>FGA</td> <td>23</td> </tr> <tr> <td>Penta D</td> <td>9,14</td> </tr> <tr> <td>Penta E</td> <td>12,14</td> </tr> <tr> <td>TH01</td> <td>8 (RCB)<br/>8,9.3 (ATCC; CCRID; Cosmic-CLP; JCRB; KCLB; PubMed=22710073; PubMed=25877200; PubMed=29156801; TKG)</td> </tr> <tr> <td>TPOX</td> <td>8,10</td> </tr> <tr> <td>vWA</td> <td>15,16,17 (JCRB)<br/>15,17 (ATCC; CCRID; Cosmic-CLP; KCLB; PubMed=22710073; PubMed=25877200; PubMed=29156801; RCB; TKG)</td> </tr> </table> <p><a href="#">Run an STR similarity search on this cell line</a></p> | Amelogenin | X | CSF1PO | 11 | D2S1338 | 18 | D3S1358 | 16 | D5S818 | 12 | D7S820 | 9,10 | D8S1179 | 14 | D13S317 | 11,12 (PubMed=22710073)<br>11,13 (ATCC; CCRID; Cosmic-CLP; JCRB; KCLB; PubMed=25877200; PubMed=29156801; RCB; TKG) | D16S539 | 12,13 | D18S51 | 12 | D19S433 | 13,15.2 | D21S11 | 30,31 | FGA | 23 | Penta D | 9,14 | Penta E | 12,14 | TH01 | 8 (RCB)<br>8,9.3 (ATCC; CCRID; Cosmic-CLP; JCRB; KCLB; PubMed=22710073; PubMed=25877200; PubMed=29156801; TKG) | TPOX | 8,10 | vWA | 15,16,17 (JCRB)<br>15,17 (ATCC; CCRID; Cosmic-CLP; KCLB; PubMed=22710073; PubMed=25877200; PubMed=29156801; RCB; TKG) |
| Amelogenin                                | X                                                                                                                                                                                                                                                                                                                                                                                                                                                                                                                                                                                                                                                                                                                                                                                                                                                                                                                                                                                                                                                                                                                                                                                                                                                                                                                                                       |            |   |        |    |         |    |         |    |        |    |        |      |         |    |         |                                                                                                                    |         |       |        |    |         |         |        |       |     |    |         |      |         |       |      |                                                                                                                |      |      |     |                                                                                                                       |
| CSF1PO                                    | 11                                                                                                                                                                                                                                                                                                                                                                                                                                                                                                                                                                                                                                                                                                                                                                                                                                                                                                                                                                                                                                                                                                                                                                                                                                                                                                                                                      |            |   |        |    |         |    |         |    |        |    |        |      |         |    |         |                                                                                                                    |         |       |        |    |         |         |        |       |     |    |         |      |         |       |      |                                                                                                                |      |      |     |                                                                                                                       |
| D2S1338                                   | 18                                                                                                                                                                                                                                                                                                                                                                                                                                                                                                                                                                                                                                                                                                                                                                                                                                                                                                                                                                                                                                                                                                                                                                                                                                                                                                                                                      |            |   |        |    |         |    |         |    |        |    |        |      |         |    |         |                                                                                                                    |         |       |        |    |         |         |        |       |     |    |         |      |         |       |      |                                                                                                                |      |      |     |                                                                                                                       |
| D3S1358                                   | 16                                                                                                                                                                                                                                                                                                                                                                                                                                                                                                                                                                                                                                                                                                                                                                                                                                                                                                                                                                                                                                                                                                                                                                                                                                                                                                                                                      |            |   |        |    |         |    |         |    |        |    |        |      |         |    |         |                                                                                                                    |         |       |        |    |         |         |        |       |     |    |         |      |         |       |      |                                                                                                                |      |      |     |                                                                                                                       |
| D5S818                                    | 12                                                                                                                                                                                                                                                                                                                                                                                                                                                                                                                                                                                                                                                                                                                                                                                                                                                                                                                                                                                                                                                                                                                                                                                                                                                                                                                                                      |            |   |        |    |         |    |         |    |        |    |        |      |         |    |         |                                                                                                                    |         |       |        |    |         |         |        |       |     |    |         |      |         |       |      |                                                                                                                |      |      |     |                                                                                                                       |
| D7S820                                    | 9,10                                                                                                                                                                                                                                                                                                                                                                                                                                                                                                                                                                                                                                                                                                                                                                                                                                                                                                                                                                                                                                                                                                                                                                                                                                                                                                                                                    |            |   |        |    |         |    |         |    |        |    |        |      |         |    |         |                                                                                                                    |         |       |        |    |         |         |        |       |     |    |         |      |         |       |      |                                                                                                                |      |      |     |                                                                                                                       |
| D8S1179                                   | 14                                                                                                                                                                                                                                                                                                                                                                                                                                                                                                                                                                                                                                                                                                                                                                                                                                                                                                                                                                                                                                                                                                                                                                                                                                                                                                                                                      |            |   |        |    |         |    |         |    |        |    |        |      |         |    |         |                                                                                                                    |         |       |        |    |         |         |        |       |     |    |         |      |         |       |      |                                                                                                                |      |      |     |                                                                                                                       |
| D13S317                                   | 11,12 (PubMed=22710073)<br>11,13 (ATCC; CCRID; Cosmic-CLP; JCRB; KCLB; PubMed=25877200; PubMed=29156801; RCB; TKG)                                                                                                                                                                                                                                                                                                                                                                                                                                                                                                                                                                                                                                                                                                                                                                                                                                                                                                                                                                                                                                                                                                                                                                                                                                      |            |   |        |    |         |    |         |    |        |    |        |      |         |    |         |                                                                                                                    |         |       |        |    |         |         |        |       |     |    |         |      |         |       |      |                                                                                                                |      |      |     |                                                                                                                       |
| D16S539                                   | 12,13                                                                                                                                                                                                                                                                                                                                                                                                                                                                                                                                                                                                                                                                                                                                                                                                                                                                                                                                                                                                                                                                                                                                                                                                                                                                                                                                                   |            |   |        |    |         |    |         |    |        |    |        |      |         |    |         |                                                                                                                    |         |       |        |    |         |         |        |       |     |    |         |      |         |       |      |                                                                                                                |      |      |     |                                                                                                                       |
| D18S51                                    | 12                                                                                                                                                                                                                                                                                                                                                                                                                                                                                                                                                                                                                                                                                                                                                                                                                                                                                                                                                                                                                                                                                                                                                                                                                                                                                                                                                      |            |   |        |    |         |    |         |    |        |    |        |      |         |    |         |                                                                                                                    |         |       |        |    |         |         |        |       |     |    |         |      |         |       |      |                                                                                                                |      |      |     |                                                                                                                       |
| D19S433                                   | 13,15.2                                                                                                                                                                                                                                                                                                                                                                                                                                                                                                                                                                                                                                                                                                                                                                                                                                                                                                                                                                                                                                                                                                                                                                                                                                                                                                                                                 |            |   |        |    |         |    |         |    |        |    |        |      |         |    |         |                                                                                                                    |         |       |        |    |         |         |        |       |     |    |         |      |         |       |      |                                                                                                                |      |      |     |                                                                                                                       |
| D21S11                                    | 30,31                                                                                                                                                                                                                                                                                                                                                                                                                                                                                                                                                                                                                                                                                                                                                                                                                                                                                                                                                                                                                                                                                                                                                                                                                                                                                                                                                   |            |   |        |    |         |    |         |    |        |    |        |      |         |    |         |                                                                                                                    |         |       |        |    |         |         |        |       |     |    |         |      |         |       |      |                                                                                                                |      |      |     |                                                                                                                       |
| FGA                                       | 23                                                                                                                                                                                                                                                                                                                                                                                                                                                                                                                                                                                                                                                                                                                                                                                                                                                                                                                                                                                                                                                                                                                                                                                                                                                                                                                                                      |            |   |        |    |         |    |         |    |        |    |        |      |         |    |         |                                                                                                                    |         |       |        |    |         |         |        |       |     |    |         |      |         |       |      |                                                                                                                |      |      |     |                                                                                                                       |
| Penta D                                   | 9,14                                                                                                                                                                                                                                                                                                                                                                                                                                                                                                                                                                                                                                                                                                                                                                                                                                                                                                                                                                                                                                                                                                                                                                                                                                                                                                                                                    |            |   |        |    |         |    |         |    |        |    |        |      |         |    |         |                                                                                                                    |         |       |        |    |         |         |        |       |     |    |         |      |         |       |      |                                                                                                                |      |      |     |                                                                                                                       |
| Penta E                                   | 12,14                                                                                                                                                                                                                                                                                                                                                                                                                                                                                                                                                                                                                                                                                                                                                                                                                                                                                                                                                                                                                                                                                                                                                                                                                                                                                                                                                   |            |   |        |    |         |    |         |    |        |    |        |      |         |    |         |                                                                                                                    |         |       |        |    |         |         |        |       |     |    |         |      |         |       |      |                                                                                                                |      |      |     |                                                                                                                       |
| TH01                                      | 8 (RCB)<br>8,9.3 (ATCC; CCRID; Cosmic-CLP; JCRB; KCLB; PubMed=22710073; PubMed=25877200; PubMed=29156801; TKG)                                                                                                                                                                                                                                                                                                                                                                                                                                                                                                                                                                                                                                                                                                                                                                                                                                                                                                                                                                                                                                                                                                                                                                                                                                          |            |   |        |    |         |    |         |    |        |    |        |      |         |    |         |                                                                                                                    |         |       |        |    |         |         |        |       |     |    |         |      |         |       |      |                                                                                                                |      |      |     |                                                                                                                       |
| TPOX                                      | 8,10                                                                                                                                                                                                                                                                                                                                                                                                                                                                                                                                                                                                                                                                                                                                                                                                                                                                                                                                                                                                                                                                                                                                                                                                                                                                                                                                                    |            |   |        |    |         |    |         |    |        |    |        |      |         |    |         |                                                                                                                    |         |       |        |    |         |         |        |       |     |    |         |      |         |       |      |                                                                                                                |      |      |     |                                                                                                                       |
| vWA                                       | 15,16,17 (JCRB)<br>15,17 (ATCC; CCRID; Cosmic-CLP; KCLB; PubMed=22710073; PubMed=25877200; PubMed=29156801; RCB; TKG)                                                                                                                                                                                                                                                                                                                                                                                                                                                                                                                                                                                                                                                                                                                                                                                                                                                                                                                                                                                                                                                                                                                                                                                                                                   |            |   |        |    |         |    |         |    |        |    |        |      |         |    |         |                                                                                                                    |         |       |        |    |         |         |        |       |     |    |         |      |         |       |      |                                                                                                                |      |      |     |                                                                                                                       |

**Note:** The STR online match analysis of the test cell against EXPASY database, showing cell number (Cell No.) and cell name.

**3. Authentication**

- The submitted sample profile is human, but not a match for any profile in the DSMZ STR database.
- The submitted profile is an exact match for the following human cell line(s) in the EXPASY STR database (8 core loci plus Amelogenin) **ME-180**.
- The submitted profile is similar to the following DSMZ human cell line: /.

- **Note:** A cell line can be considered to be authenticated when 80% (exact match) of the

***Your Intimate Partner in Bioscience!***

alleles in its STR profile match profiles from tissue or other cell line samples from that donor or from database. Cell lines with between a 55% to 80% (similar) match require further profiling for investigation of relatedness.

# Appendix:

## 1. Genotyping Strategy and Site Distribution

Table S1. Experimental Strategy and Sites

|   | Strategy 1 | Strategy 2 | Strategy 3 | Strategy 4 |
|---|------------|------------|------------|------------|
| 1 | D3S1358    | D8S1179    | D19S433    | AMEL       |
| 2 | VWA        | D21S11     | TH01       | D1S1656    |
| 3 | D7S820     | D16S539    | D13S317    | D5S818     |
| 4 | CSF1PO     | D2S1338    | TPOX       | D12S391    |
| 5 | PENTAE     | PENTAD     | D18S51     | FGA        |
| 6 | D6S1043    |            |            |            |

*The allele match algorithm compares the 8 core loci plus amelogenin only, even though alleles from all loci will be reported when available.*

2. DSMZ tools was used to carry on the cell line comparison, which contains 2455 cell lines STR data from ATCC, DSMZ, JCRB ,ECACC, GNE and RIKEN databases. If the cell is not included in the above cell library, users need to compared with other databases.

**Technician:** Jianan Zhang

**Checked by:** Ning Qian

**Issued by:** Yang Bai

**Issue date:** 12/24/2021
