# Supplementary material for: PDHB-AS suppresses cervical cancer progression and cisplatin resistance via inhibition on Wnt/β-catenin pathway
Source: PubMed Central journal article supplement (PMC9905568; doi:10.1038/s41419-022-05547-5), 2023-02-07

**1G**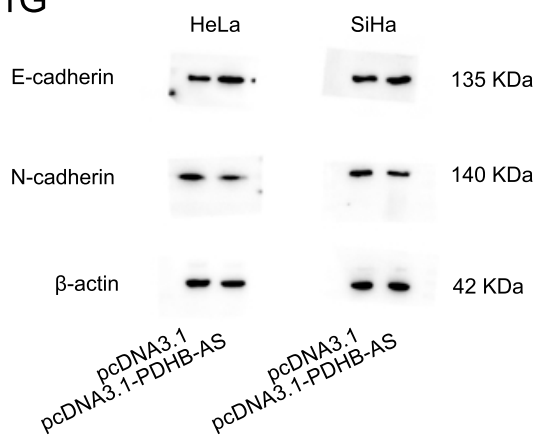**2C**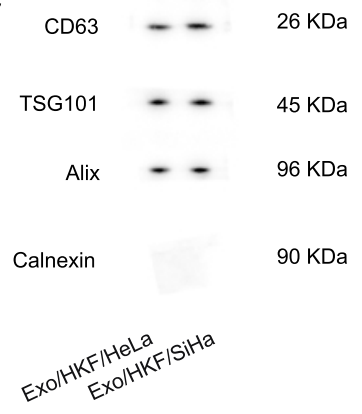**2G**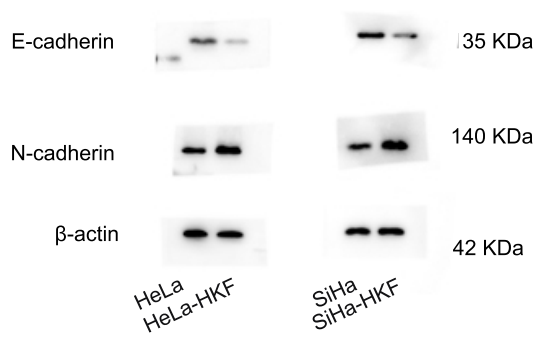**3D**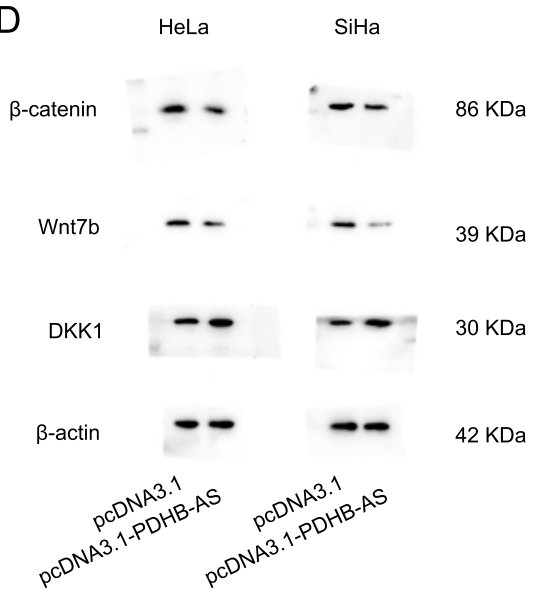**3E**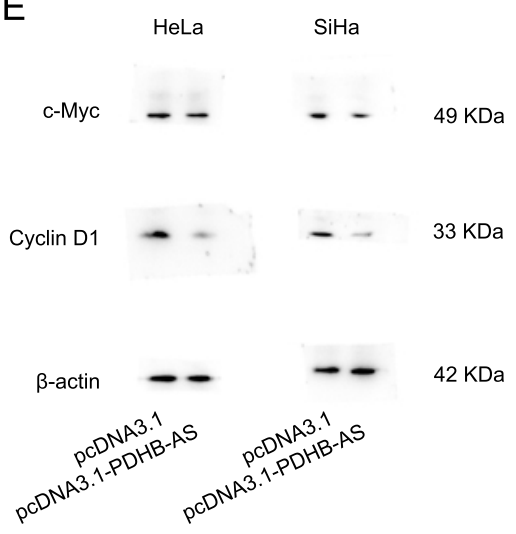

**5B**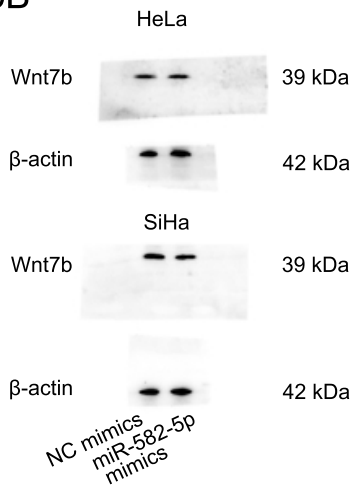**5C**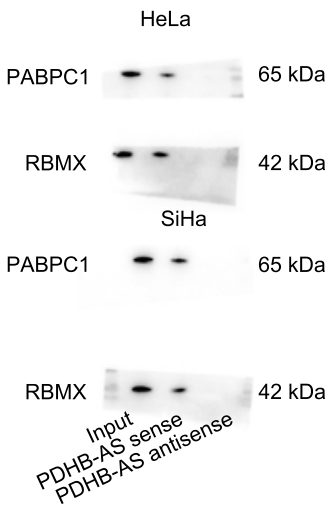**5G**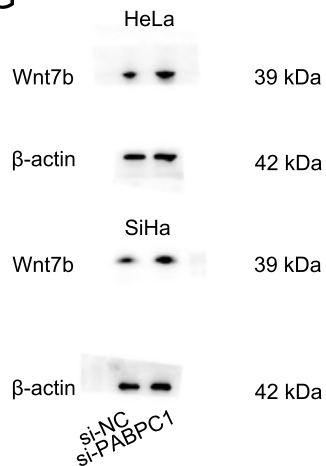**5J**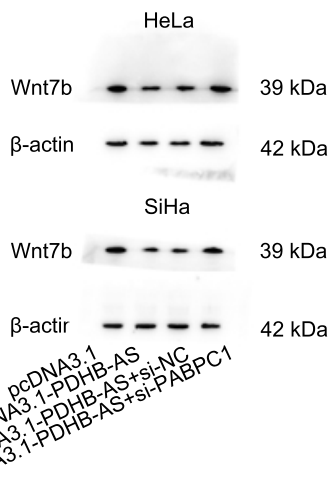**S3D**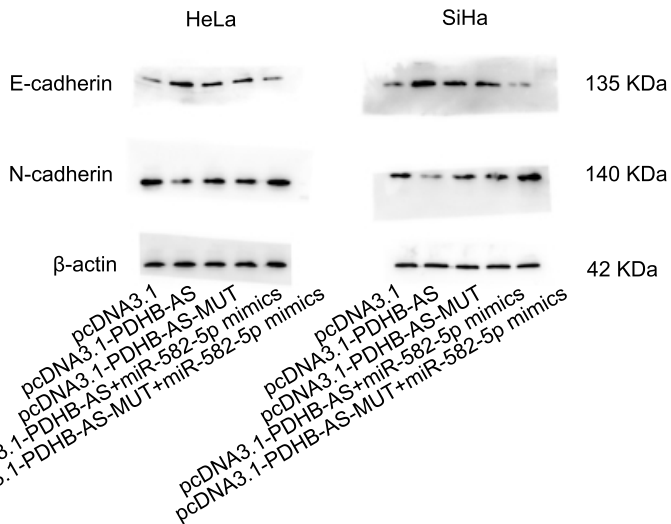

Supplement: 41419_2022_5547_MOESM10_ESM.pdf [file 41419_2022_5547_MOESM10_ESM.pdf]
