# Supplementary material for: PDHB-AS suppresses cervical cancer progression and cisplatin resistance via inhibition on Wnt/β-catenin pathway
Source: PubMed Central journal article supplement (PMC9905568; doi:10.1038/s41419-022-05547-5), 2023-02-07
Supplement: 41419_2022_5547_MOESM11_ESM.pdf [file 41419_2022_5547_MOESM11_ESM.pdf]

Please complete the table below to indicate the contributions of all named authors to the figures.

Figure 1,2,3:

|  |
|--|
|  |
|--|

Figure 4,5,6,7,8:

|  |
|--|
|  |
|--|

Figure S1,S2,S3:

|  |
|--|
|  |
|--|

Figure S4:

|  |
|--|
|  |
|--|

|  |
|--|
|  |
|--|

|  |
|--|
|  |
|--|

Signed for and on behalf of the Author(s):

|                |
|----------------|
| <i>Chi Chi</i> |
|----------------|

Print Name:

|  |
|--|
|  |
|--|

Date:

|  |
|--|
|  |
|--|
